# Supplementary material for: Core-cross-linked micellar nanoparticles from a linear-dendritic prodrug for dual-responsive drug delivery
Source: Royal Society of Chemistry journal article supplement (doi:10.1039/c3py01566a), 2013-12-16
Supplement: c3py01566a.pdf [file c3py01566a.pdf]

Supporting information for

**Core-cross-linked micellar nanoparticles from linear-dendritic prodrug for dual-responsive drug delivery**

Yu Zhang,<sup>ab</sup> Chunsheng Xiao,<sup>a</sup> Mingqiang Li,<sup>ab</sup> Jianxun Ding,<sup>a</sup> Chaoliang He,<sup>a</sup> Xiuli Zhuang<sup>a</sup> and Xuesi Chen<sup>\*a</sup>

<sup>a</sup> Key Laboratory of Polymer Ecomaterials, Changchun Institute of Applied Chemistry, Chinese Academy of Sciences, 5625 Renmin Street, Changchun 130022, P. R. China

<sup>b</sup> University of Chinese Academy of Sciences, No. 19A Yuquan Road, Beijing 100049, P. R. China

\* correspondence author, E-mail: xschen@ciac.ac.cn

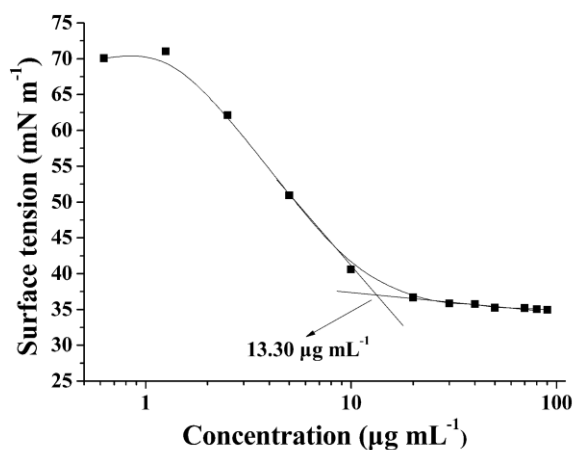

**Figure S1.** Surface tension plotted with different concentrations of non-cross-linked prodrug in distilled water.

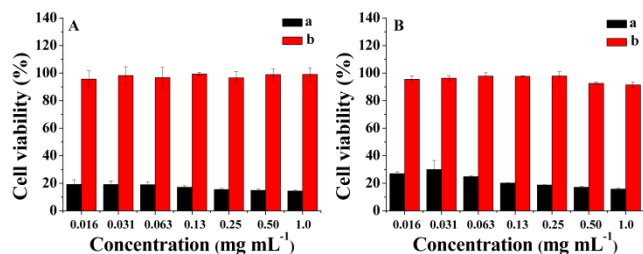

**Figure S2.** *In vitro* cytotoxicities of (a) PEI25K and (b) MPEG-*b*-PAMAM-LA to (A) HeLa cells and (B) A549 cells for 72 h. Data are presented as mean  $\pm$  standard deviation ( $n=3$ ).
